# Supplementary material
Source: PubMed Central journal article supplement (PMC7039043)

Figure S1. Cell Counting Kit-8 assays in L929 cells, B16F10 cells and A375 cells. Cells were cultured in 5% fetal bovine serum DMEM medium and treated with dioscin (0, 1, 2, 4 and 8  $\mu\text{M}$ ) for 48 h. Data are presented as mean  $\pm$  standard deviation of three independent experiments. \*\* $P < 0.01$  vs. L929 group. FBS.

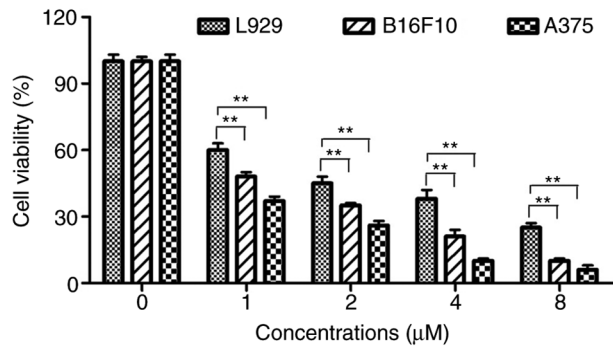

Figure S2. Cell Counting Kit-8 assays in B16F10 cells and A375 cells. Cells were cultured in 5% fetal bovine serum DMEM medium and treated with dioscin (0.00, 0.25 and 0.50  $\mu\text{M}$ ) for 12 h. Data are presented as mean  $\pm$  standard deviation of three independent experiments.

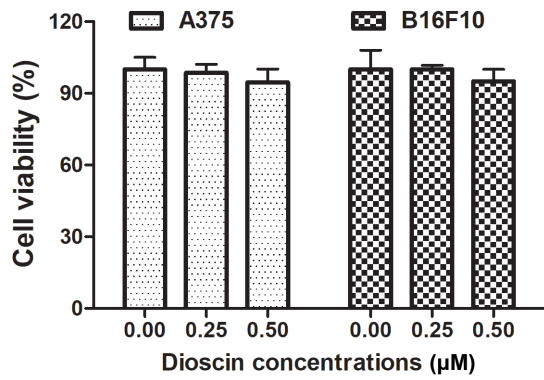

Figure S3. Dioscin lowers the ratios of p-Src/Src and p-STAT3/STAT3 in melanoma cells. Based on the results of western blot analyses in Fig. 4, the ratios of p-Src/Src and p-STAT3/STAT3 were calculated. (A) The ratios of p-Src/Src and p-STAT3/STAT3 in A375 cells. (B) The ratios of p-Src/Src and p-STAT3/STAT3 in B16F10 cells. Results for 12-, 24- and 48-h treatments were shown in the upper, middle and lower panels, respectively. The relative protein level of the control group was regarded as 1. Data are presented as the mean  $\pm$  standard deviation of three independent experiments. \* $P$ <0.05; \*\* $P$ <0.01 vs. control. STAT3, signal transducer and activator of transcription 3. FBS, fetal bovine serum; p-, phosphorylated.

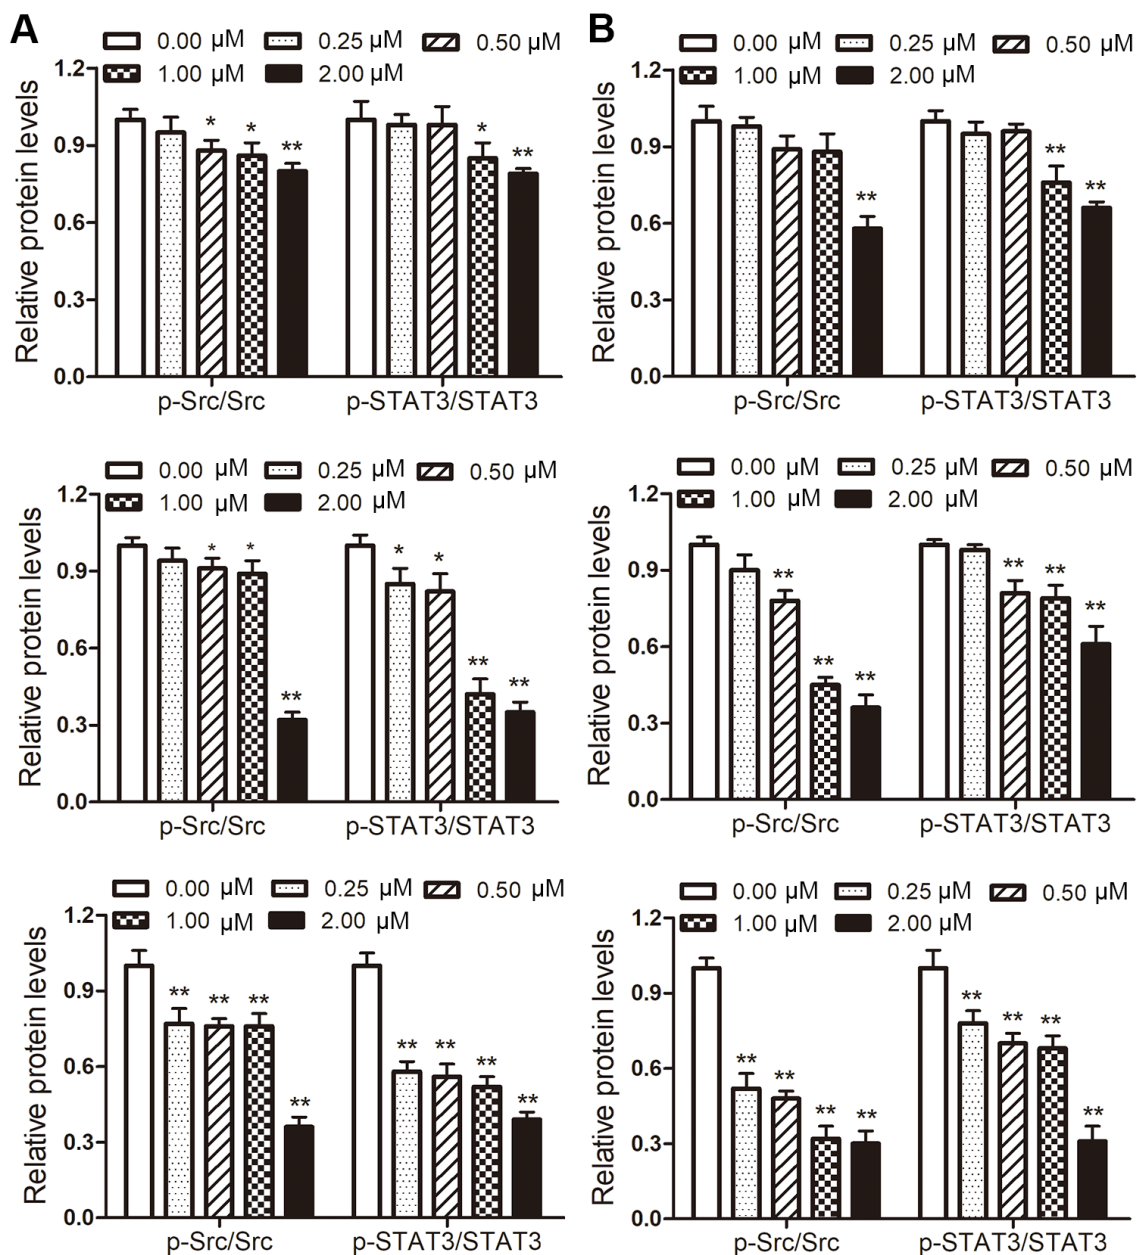

Supplement: Supplementary_Data.pdf [file Supplementary_Data.pdf]
